# Supplementary figures and images for: YTHDF2 in peritumoral hepatocytes mediates chemotherapy-induced antitumor immune responses through CX3CL1-mediated CD8+ T cell recruitment
Source: PubMed Central journal article supplement — Mol Cancer. 2024 Sep 6;23:186. doi: 10.1186/s12943-024-02097-6 (PMC11378438; doi:10.1186/s12943-024-02097-6), 2024-09-06

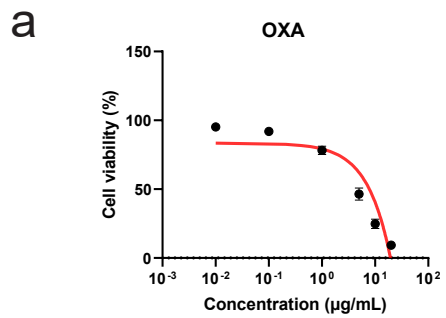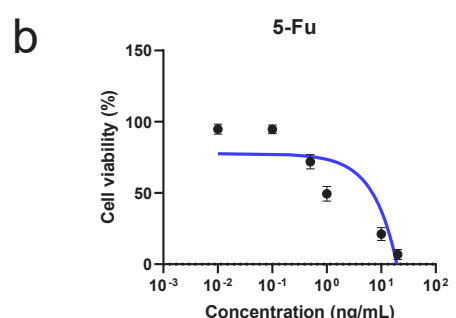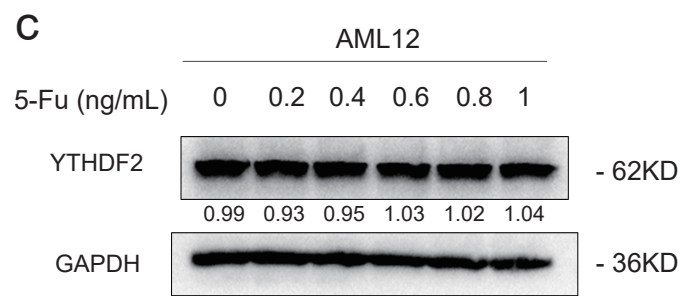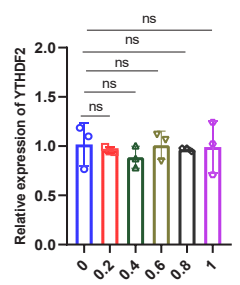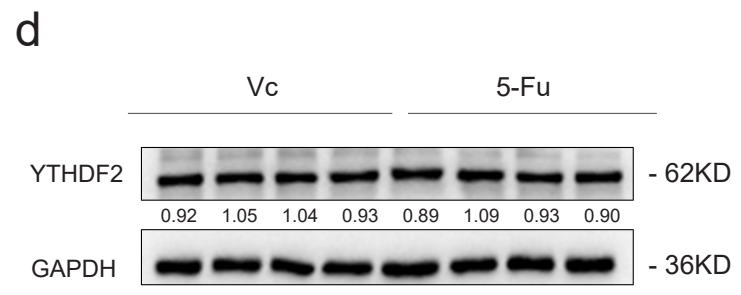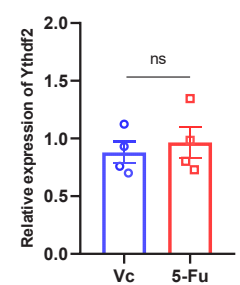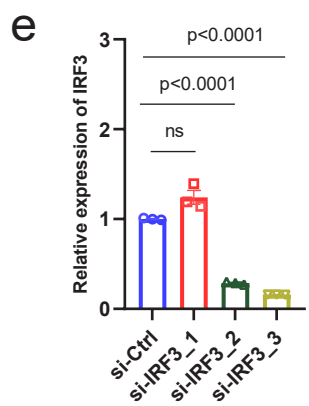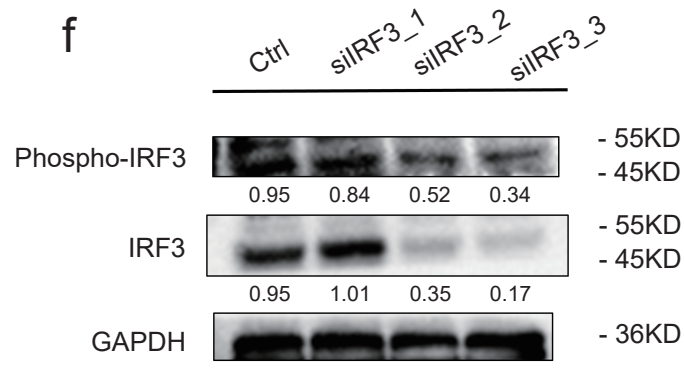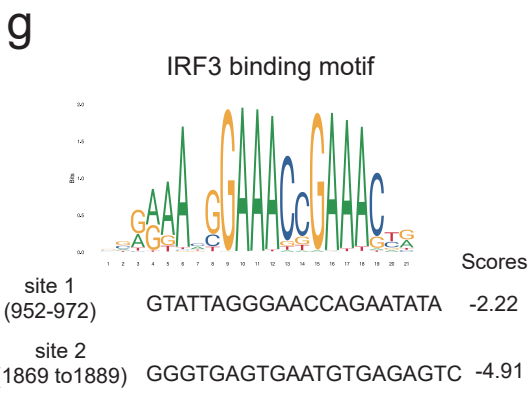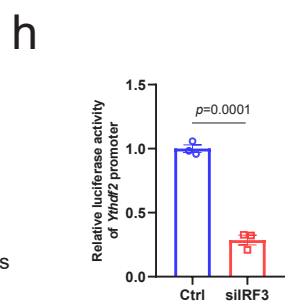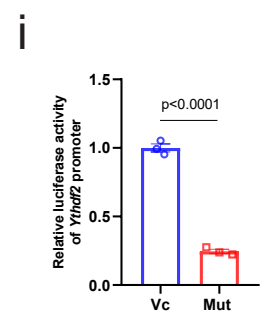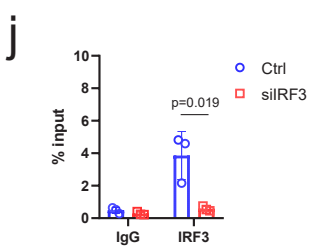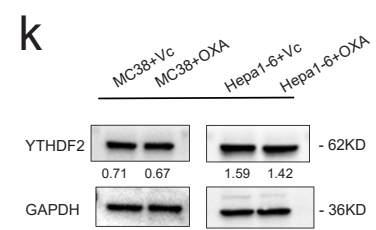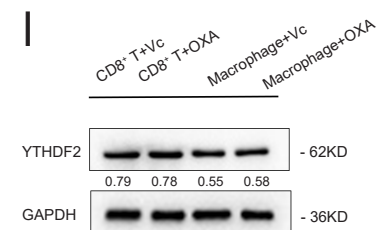

Supplement: 12943_2024_2097_MOESM1_ESM.pdf [file 12943_2024_2097_MOESM1_ESM.pdf]

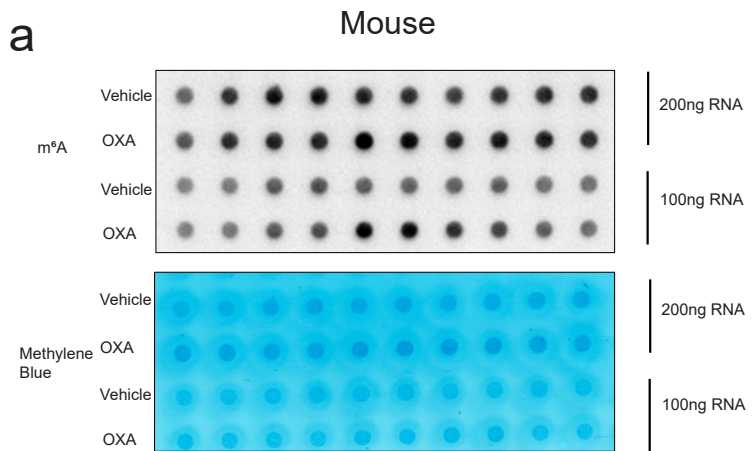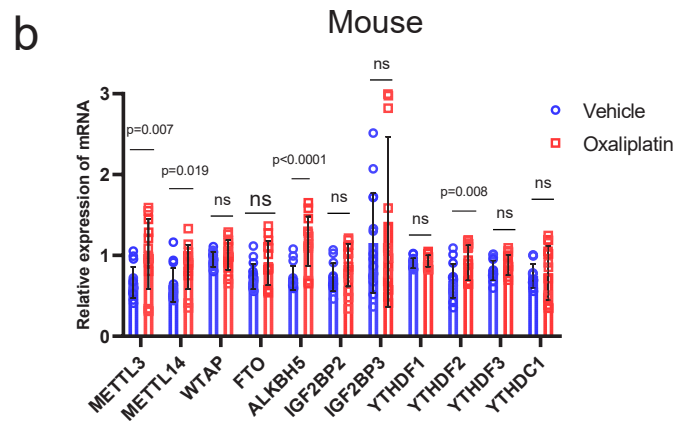

Mouse

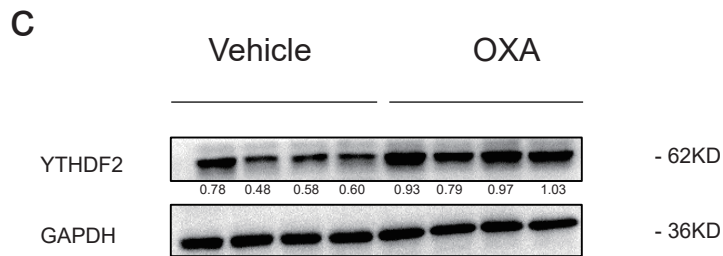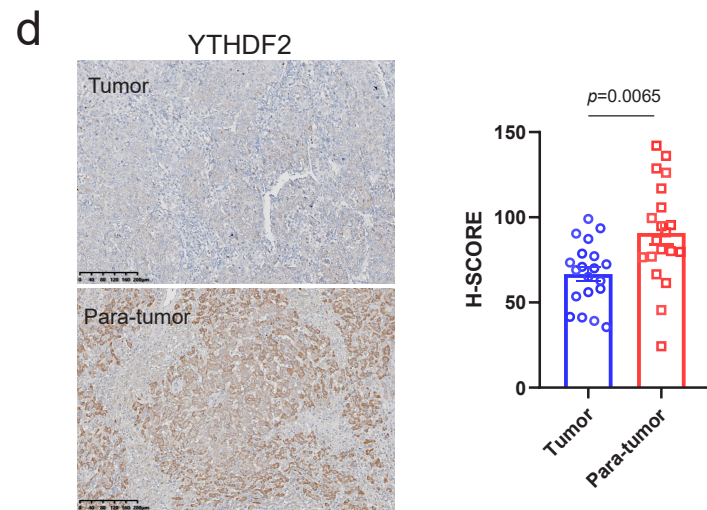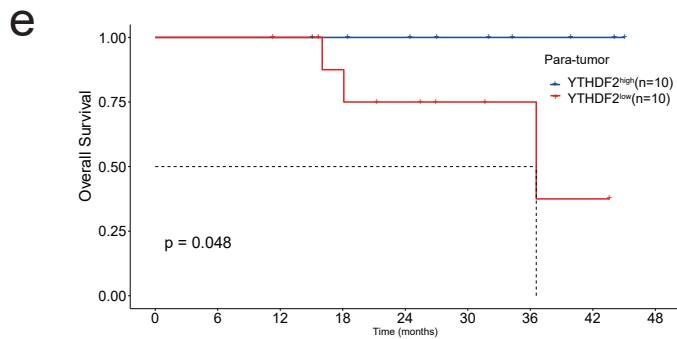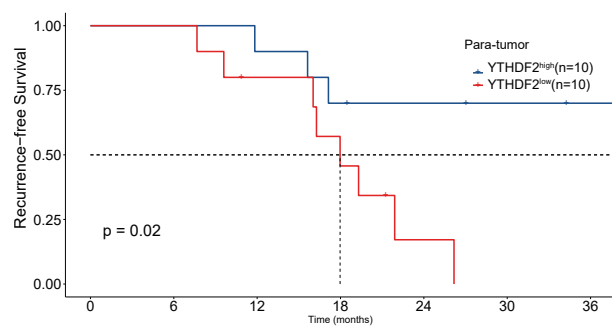

Supplement: 12943_2024_2097_MOESM2_ESM.pdf [file 12943_2024_2097_MOESM2_ESM.pdf]

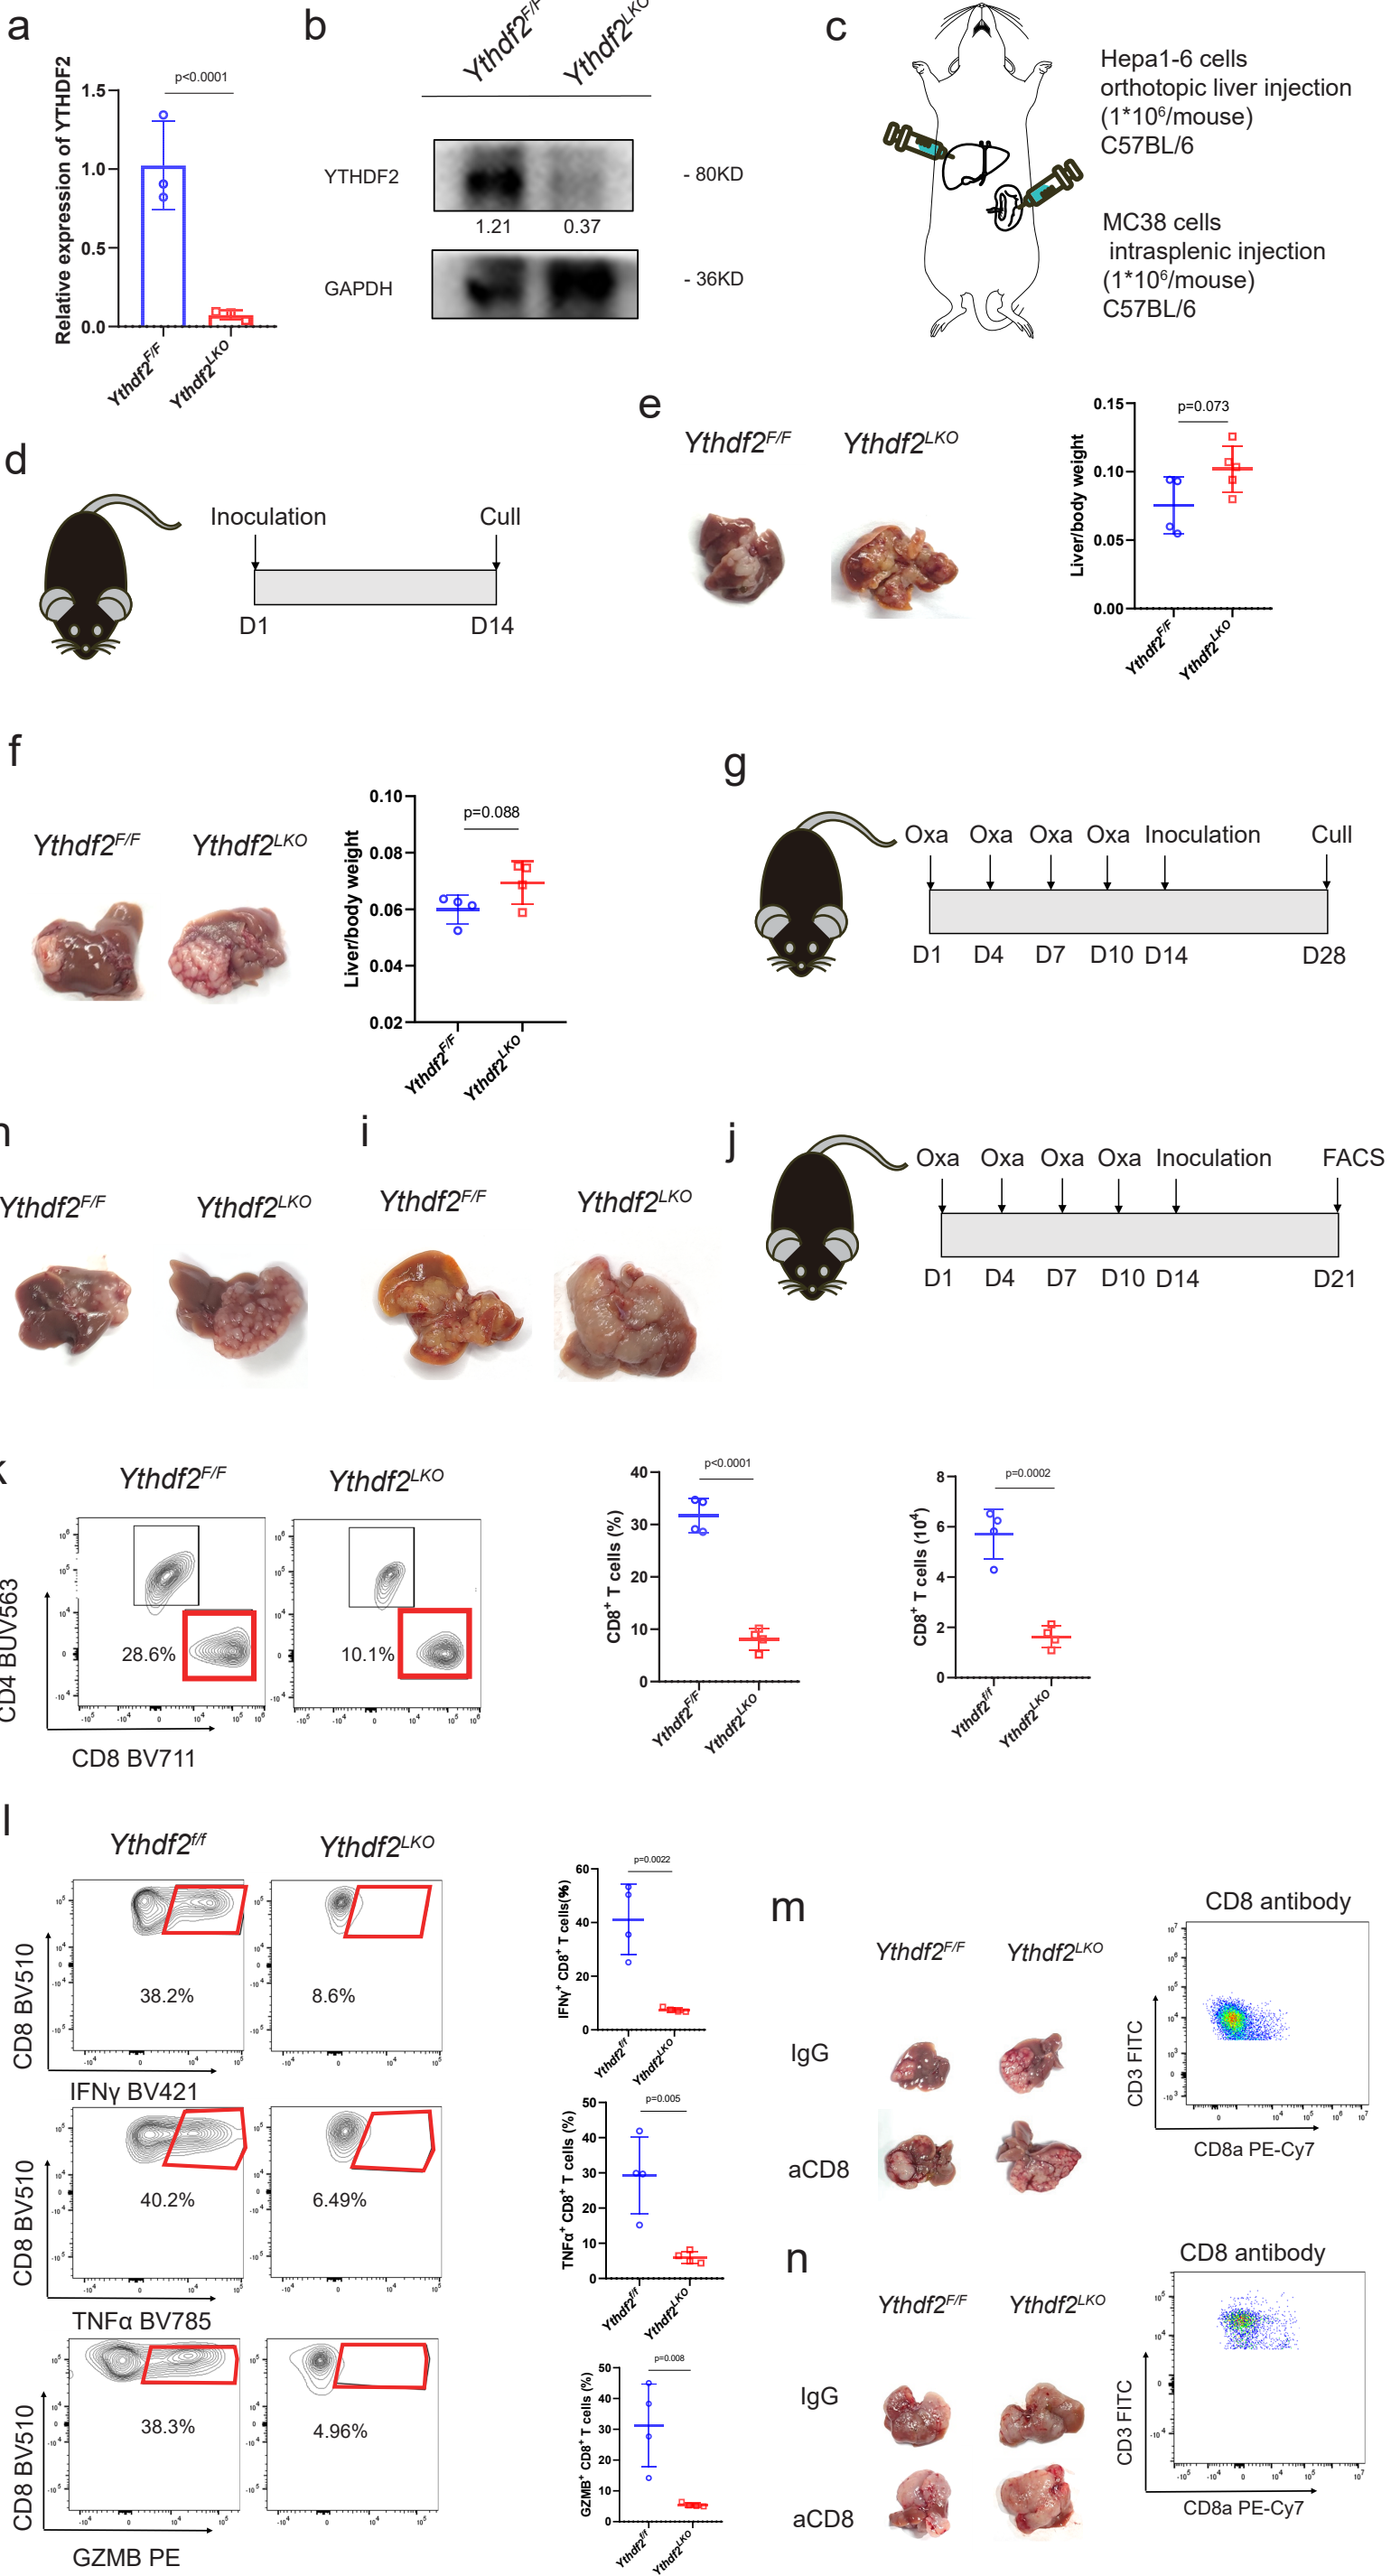

Supplement: 12943_2024_2097_MOESM3_ESM.pdf [file 12943_2024_2097_MOESM3_ESM.pdf]

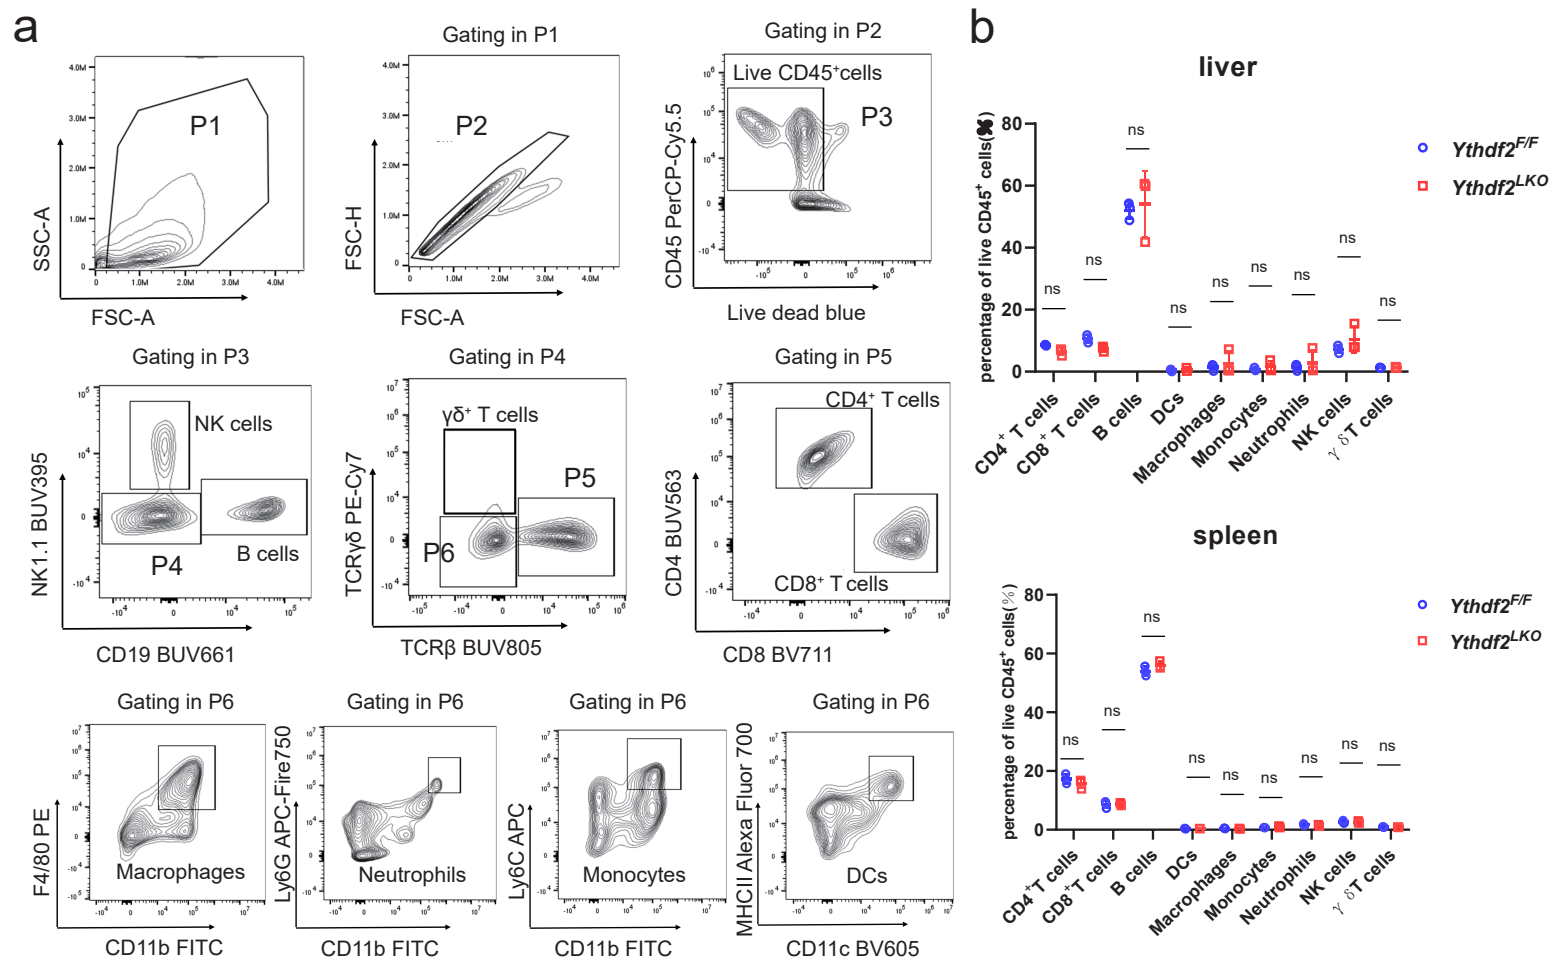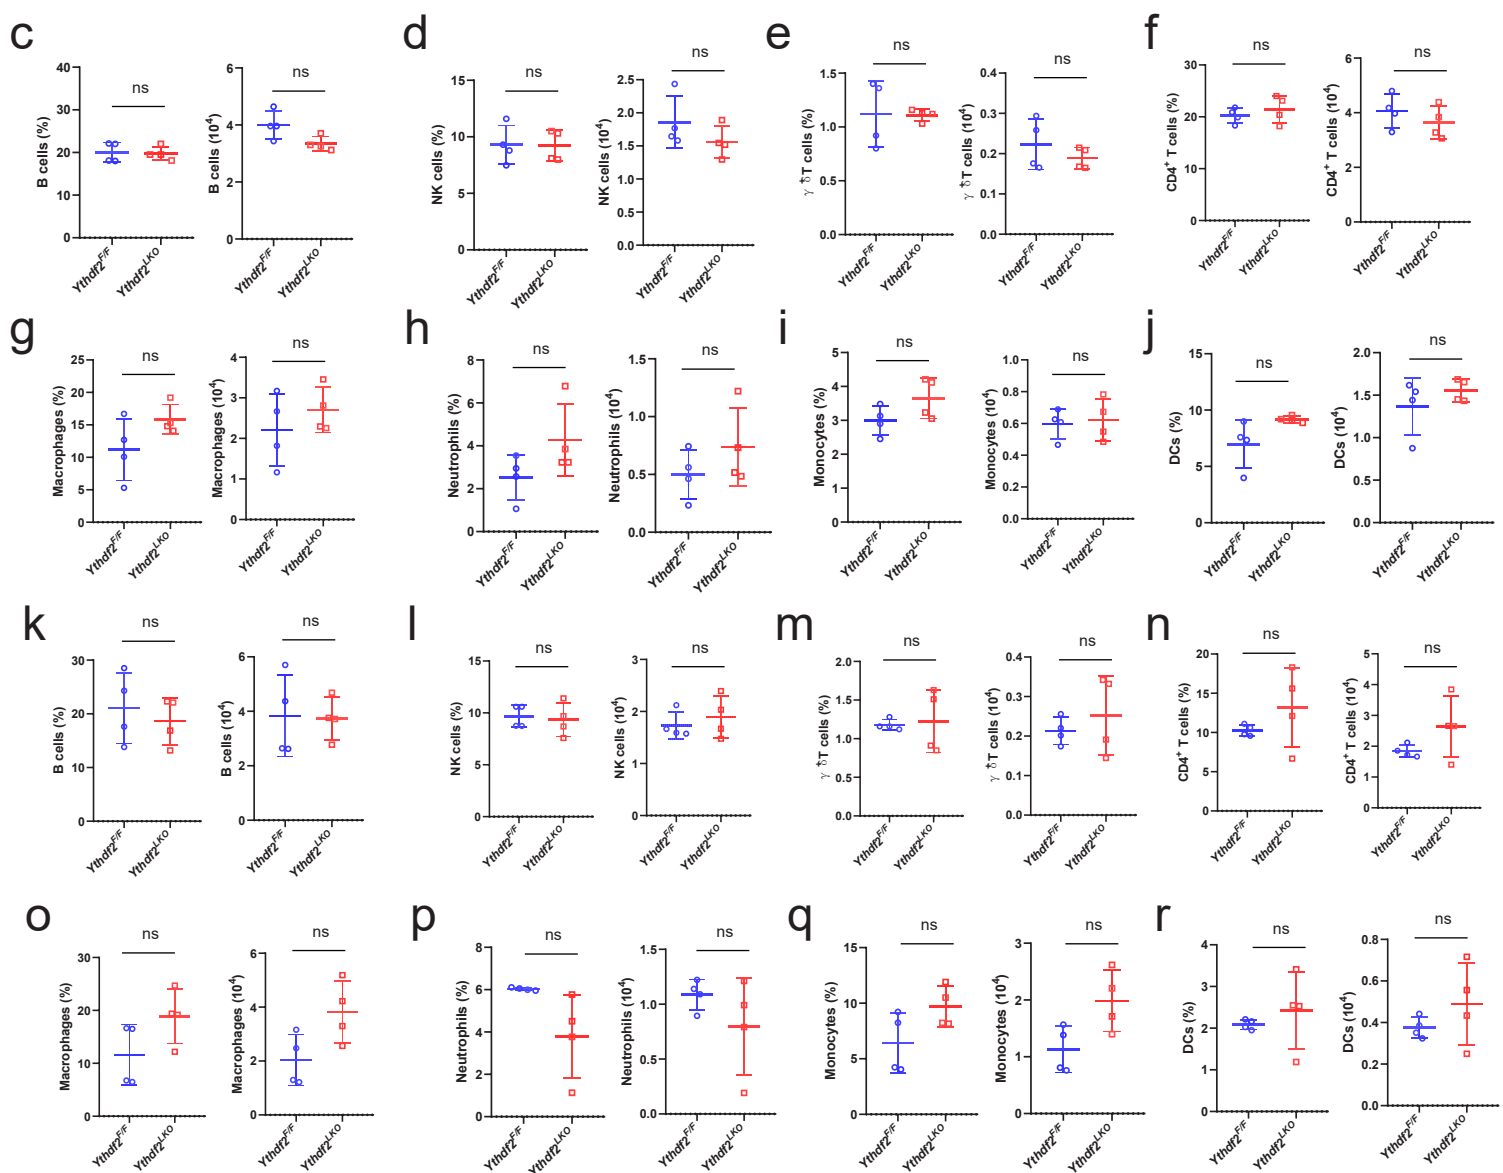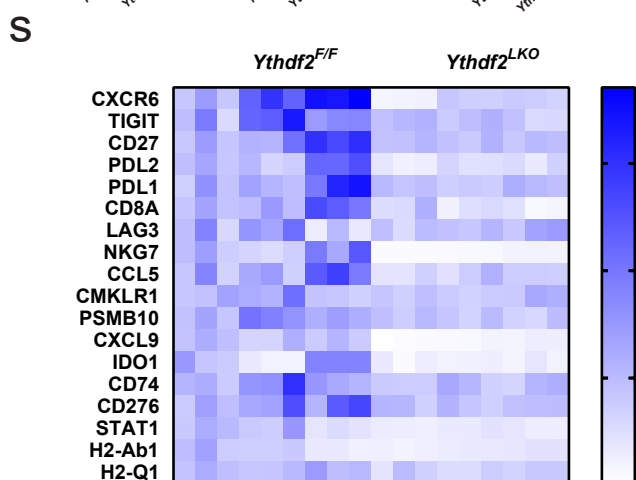

Supplement: 12943_2024_2097_MOESM4_ESM.pdf [file 12943_2024_2097_MOESM4_ESM.pdf]

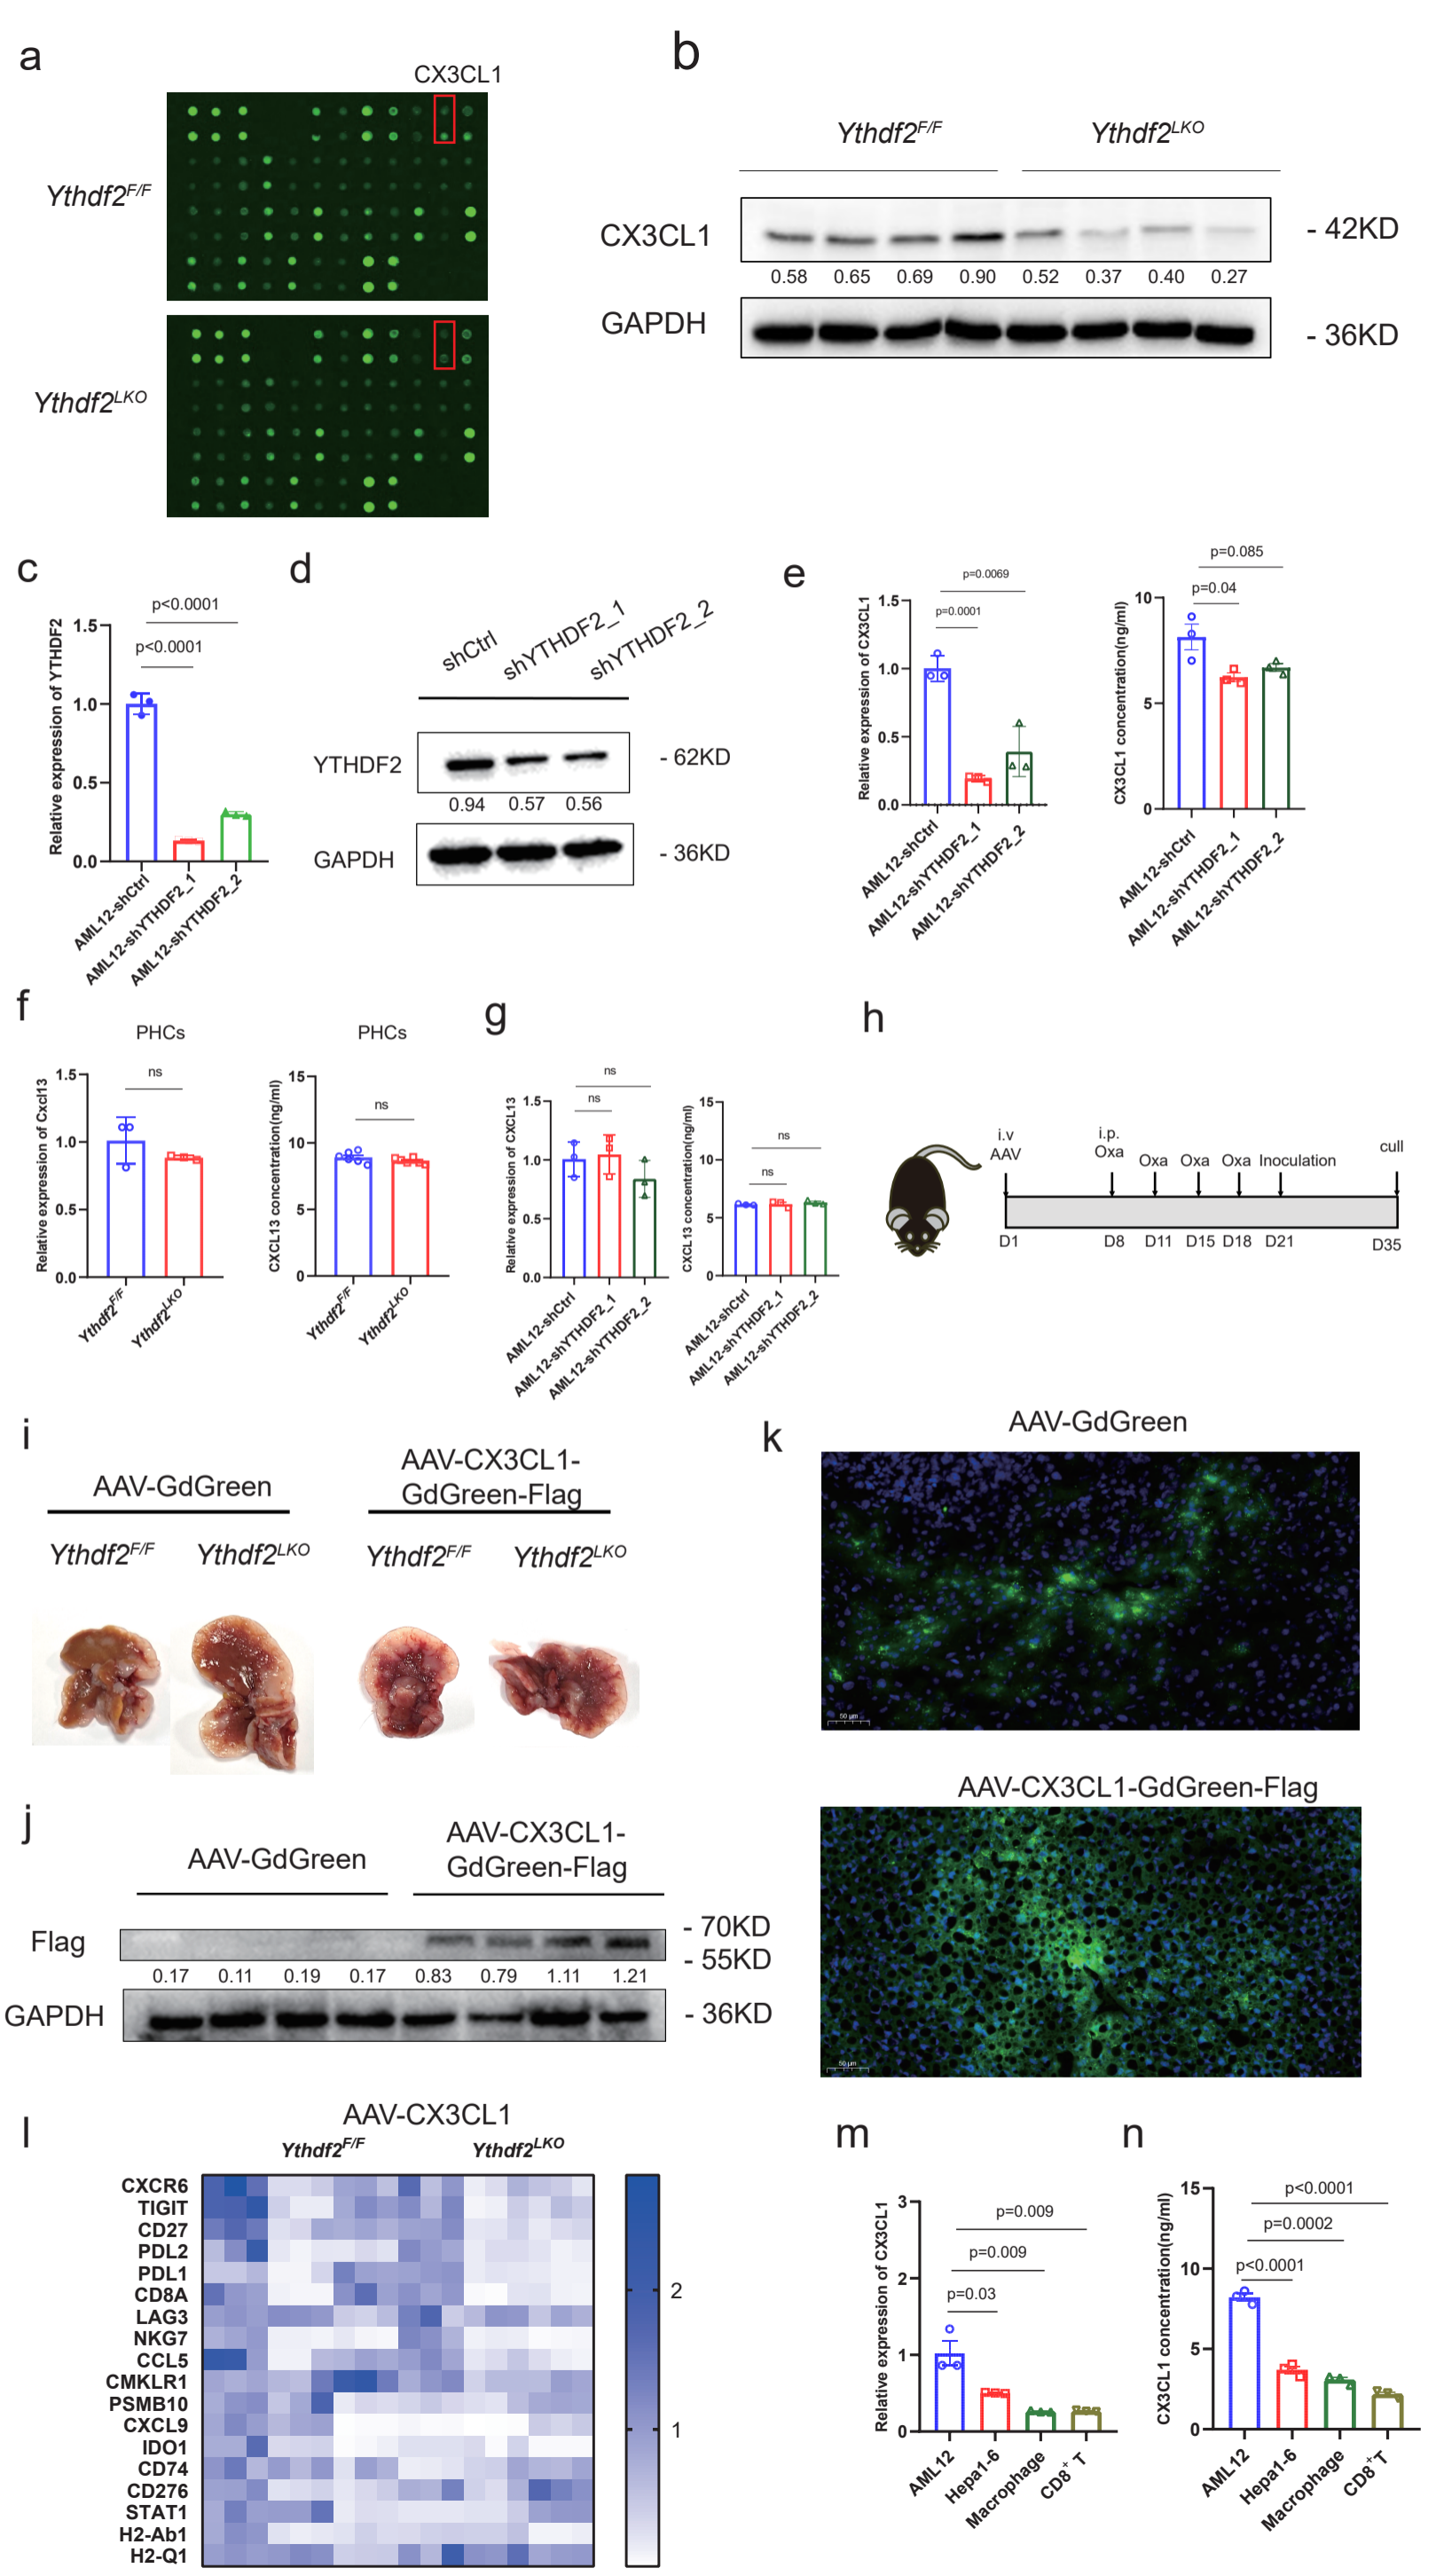

Supplement: 12943_2024_2097_MOESM5_ESM.pdf [file 12943_2024_2097_MOESM5_ESM.pdf]

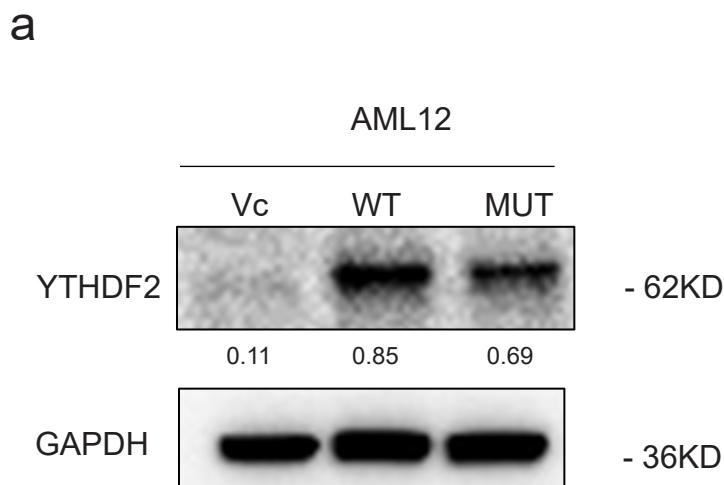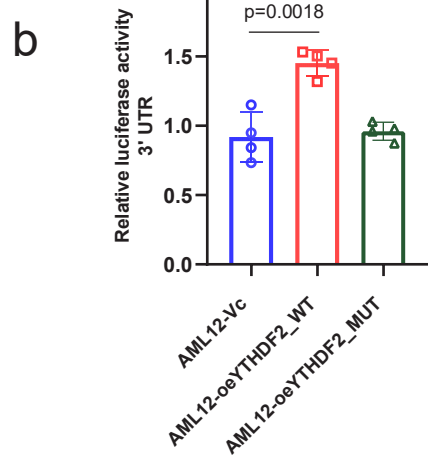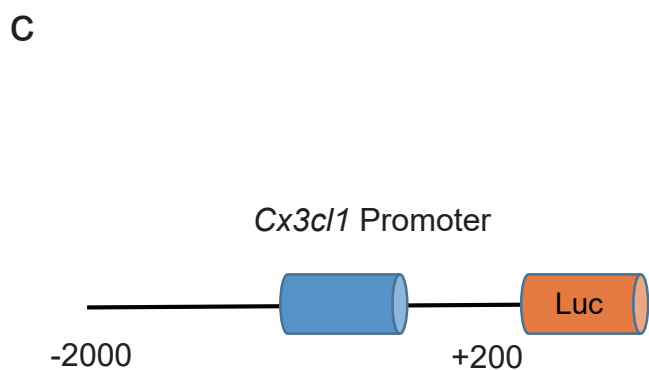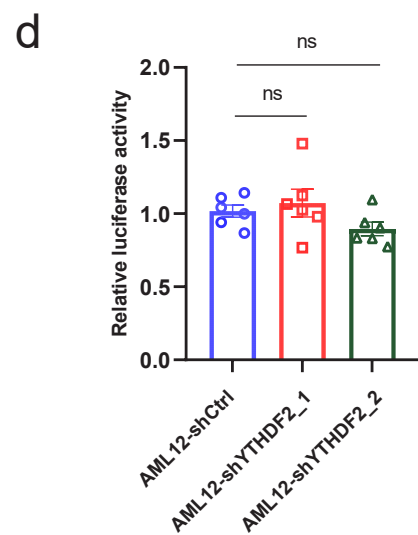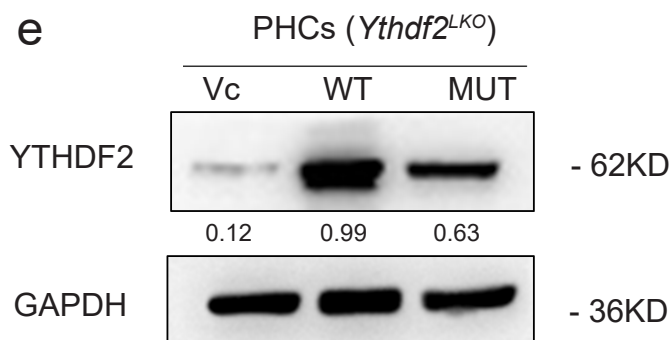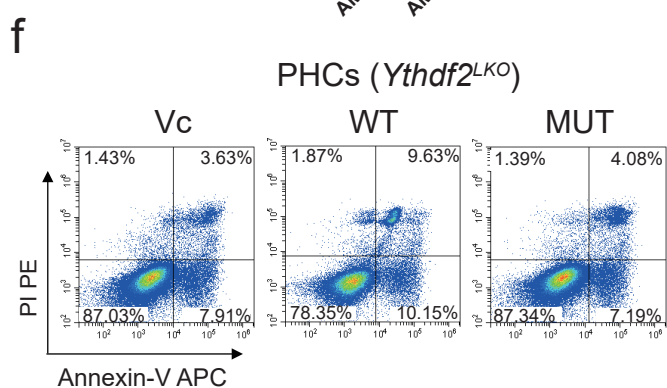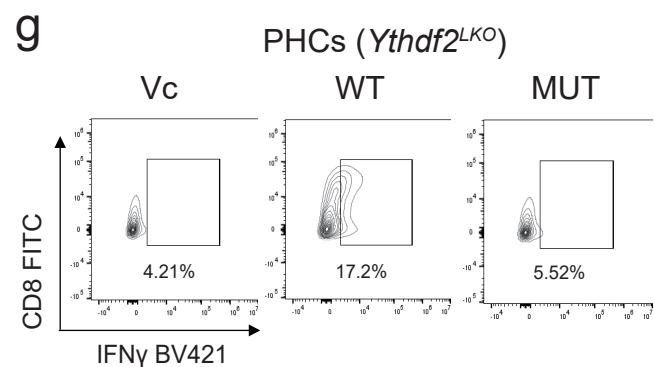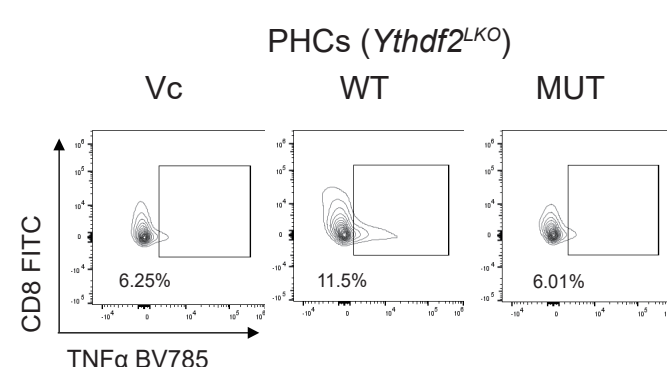

Supplement: 12943_2024_2097_MOESM6_ESM.pdf [file 12943_2024_2097_MOESM6_ESM.pdf]

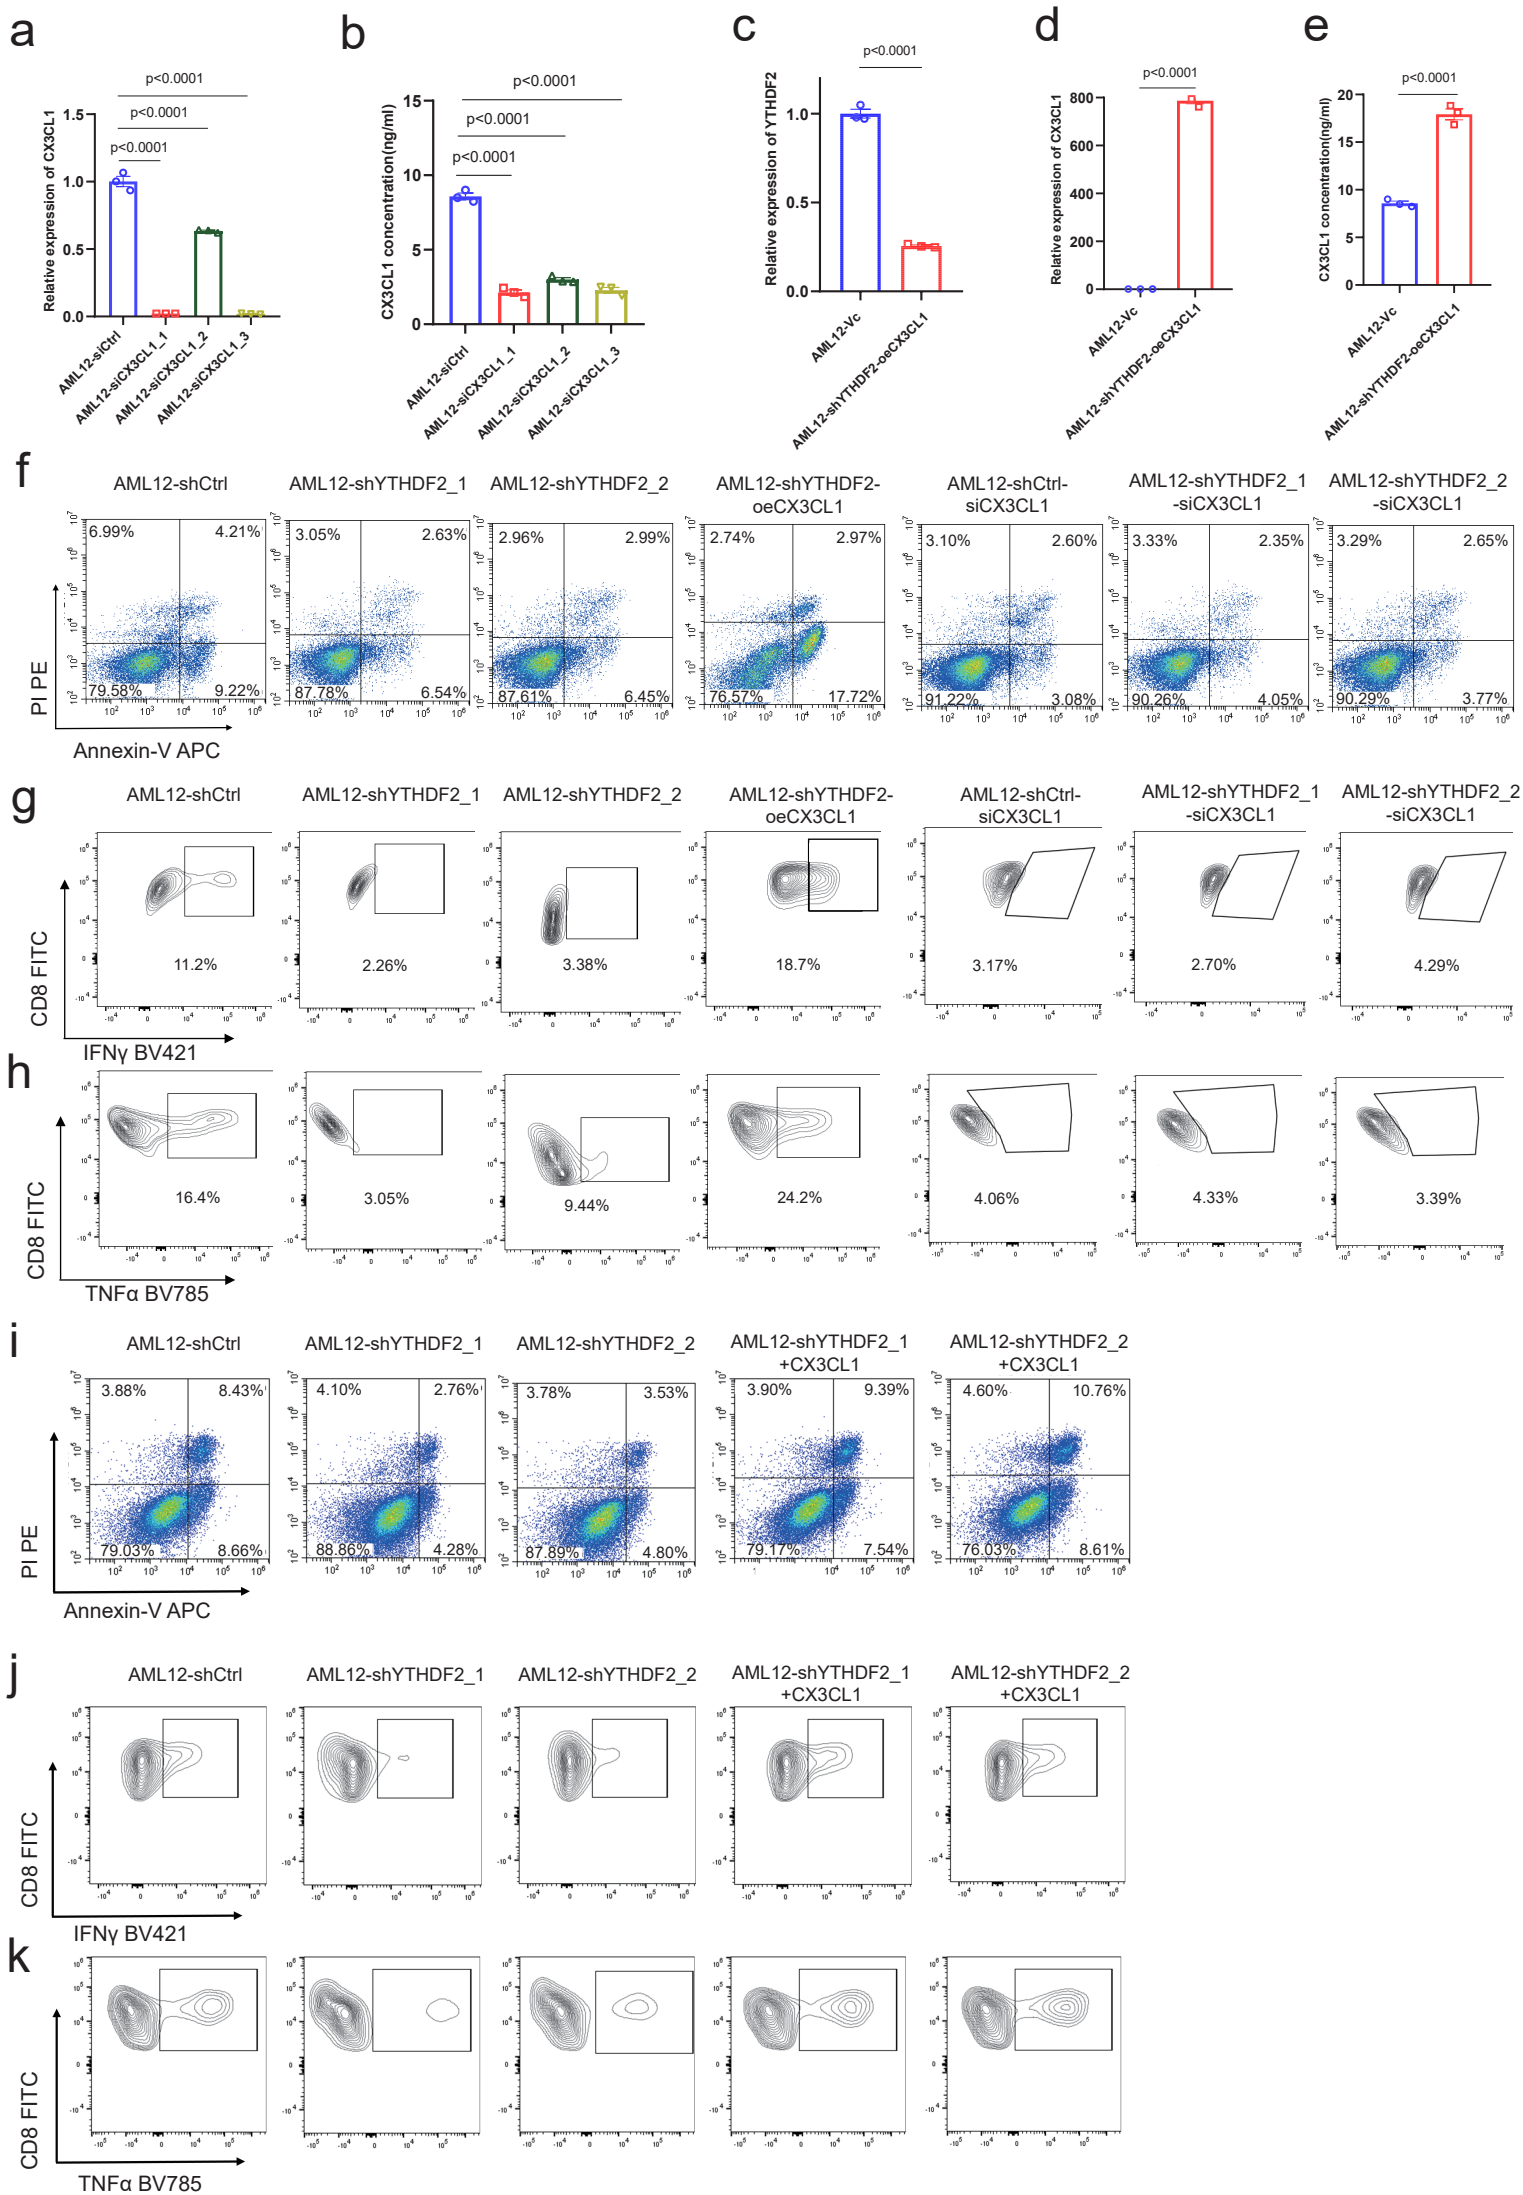

Supplement: 12943_2024_2097_MOESM7_ESM.pdf [file 12943_2024_2097_MOESM7_ESM.pdf]

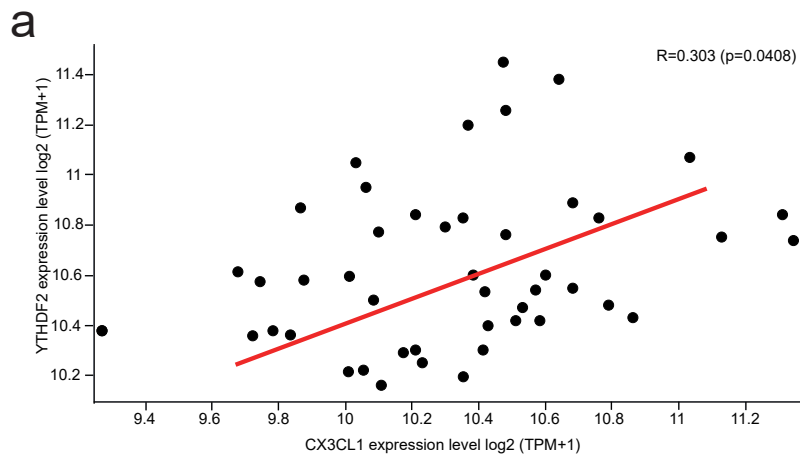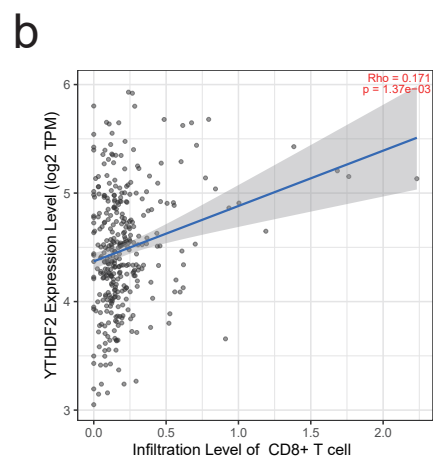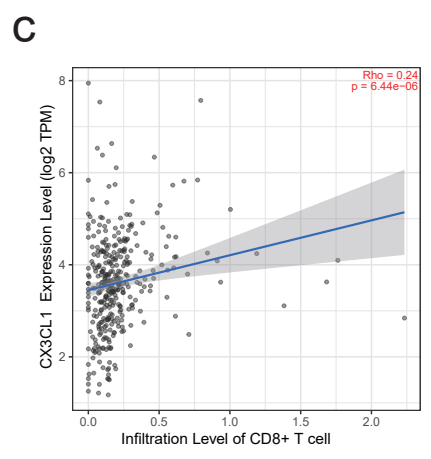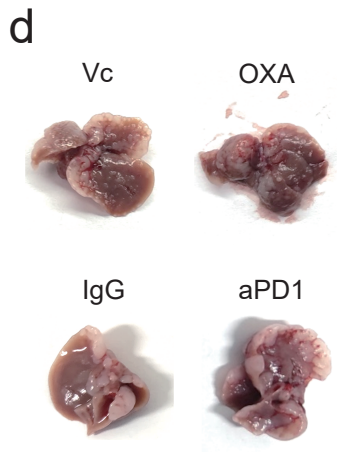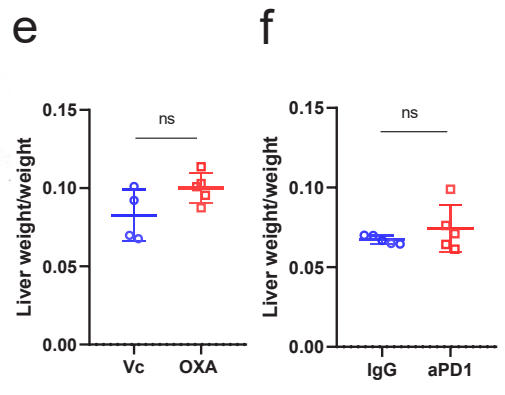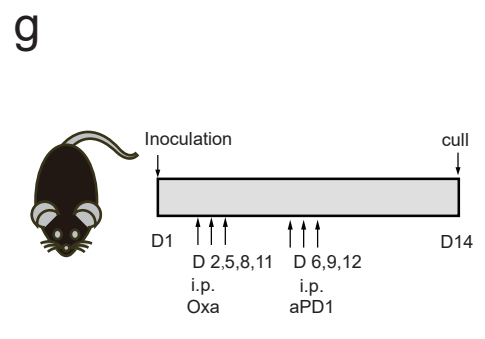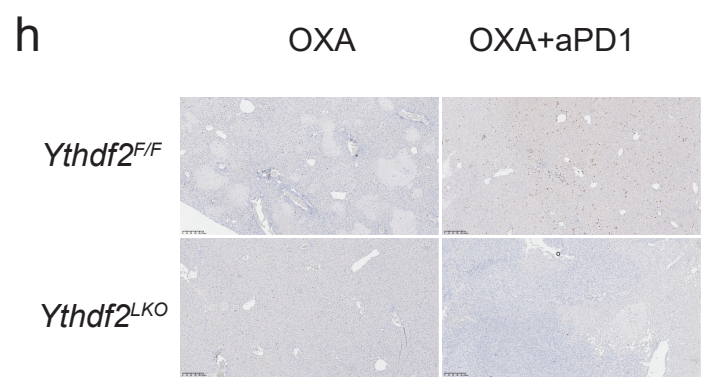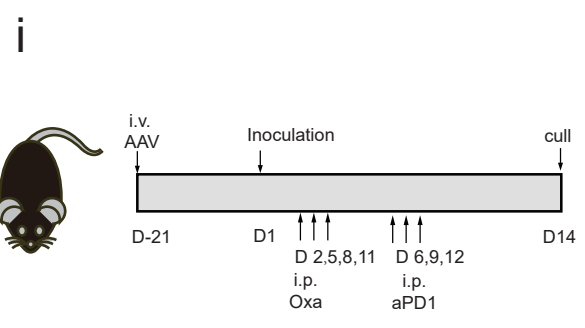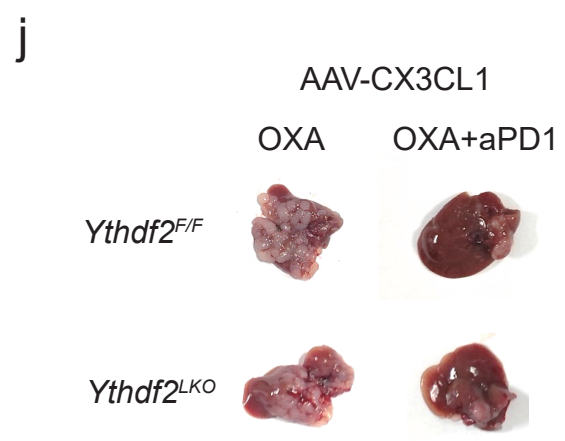

Supplement: 12943_2024_2097_MOESM9_ESM.pdf [file 12943_2024_2097_MOESM9_ESM.pdf]
